# Supplementary material
Source: Springer Nature journal article supplement (https://www.springermedizin.de/resource/supplementary/12950_2012_244_MOESM1_ESM.pdf/9558304)

**Panel 1. Control**

**Transverse**

**Sagittal**

**Coronal**

**Carotid Ultrasound**

**A**

**B**

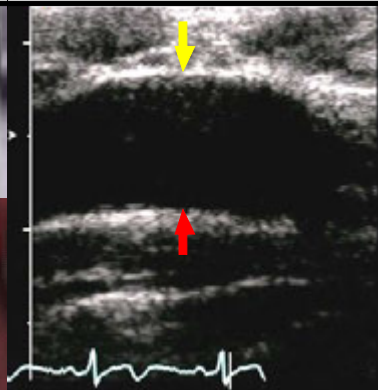

**Panel 2. HIV+**

**Transverse**

**Sagittal**

**Coronal**

**Carotid Ultrasound**

**A**

**B**

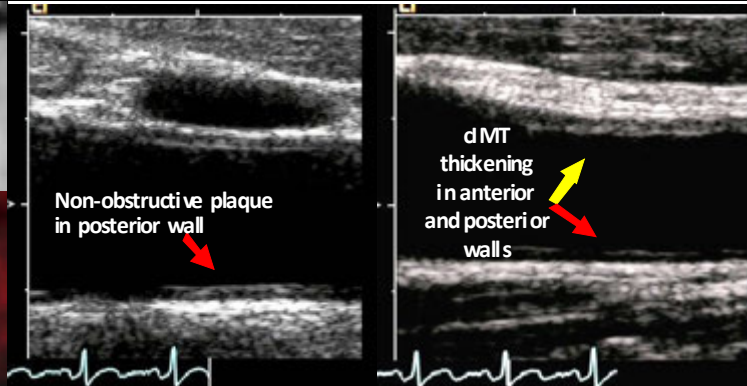

Supplement: MOESM1 [file 9558304]
